# Supplementary material for: Lipids and Transaminase in Antiretroviral-Treatment-Experienced People Living with HIV, Switching to a Doravirine-Based vs. a Rilpivirine-Based Regimen: Data from a Real-Life Setting
Source: MDPI journal article supplement (doi:10.3390/v15071612), 2023-07-23
Supplement: s1 [file s1]

Table S1. Other DOR-based regimens (n=114).

| <b>regimen</b>        | <b>N</b> | <b>%</b> |
|-----------------------|----------|----------|
| DOR/DTG/              | 50       | 43.86    |
| FTC/TAF/DOR/          | 22       | 19.30    |
| DOR/RAL/              | 10       | 8.77     |
| DOR/DRV/COBI/         | 8        | 7.02     |
| 3TC/DOR/DTG/          | 7        | 6.14     |
| 3TC/ABC/DOR/          | 4        | 3.51     |
| FTC/TAF/DOR/BIC/      | 3        | 2.63     |
| FTC/DOR/TDF/          | 2        | 1.75     |
| 3TC/ABC/NVP/DOR/      | 1        | 0.88     |
| 3TC/DOR/RAL/          | 1        | 0.88     |
| DOR/DRV/RTV/          | 1        | 0.88     |
| DOR/RAL/MRV/          | 1        | 0.88     |
| DOR/TDF/DRV/COBI/     | 1        | 0.88     |
| DOR/TDF/DTG/          | 1        | 0.88     |
| FTC/TAF/DOR/DRV/COBI/ | 1        | 0.88     |
| FTC/TAF/DOR/DTG/      | 1        | 0.88     |

Table S2. Baseline characteristics of PLWH on 3TC/TDF/DOR and other DOR-based regimens.

|                      | DOR-based regimens |       |                 |       | P       |
|----------------------|--------------------|-------|-----------------|-------|---------|
|                      | 3TC/TDF/DOR        |       | Other DOR-based |       |         |
|                      | N=142              | 55.5% | N=114           | 44.5% |         |
| Sex                  |                    |       |                 |       |         |
| F                    | 36                 | 25.4  | 37              | 32.5  |         |
| M                    | 106                | 74.6  | 77              | 67.5  | 0.21    |
| Ethnicity            |                    |       |                 |       |         |
| Caucasian            | 120                | 84.5  | 106             | 93.0  |         |
| Other                | 22                 | 15.5  | 8               | 7.0   | 0.04    |
| Risk factor          |                    |       |                 |       |         |
| IVDU                 | 14                 | 9.9   | 23              | 20.2  |         |
| Other                | 22                 | 15.5  | 19              | 16.7  |         |
| Sexual               | 106                | 74.6  | 72              | 63.2  | 0.05    |
| HBsAg                |                    |       |                 |       |         |
|                      | 16                 | 11.3  | 15              | 13.2  |         |
| N                    | 115                | 81.0  | 98              | 86.0  |         |
| Y                    | 11                 | 7.7   | 1               | 0.9   | 0.01    |
| HCV                  |                    |       |                 |       |         |
|                      | 14                 | 9.9   | 11              | 9.6   |         |
| N                    | 115                | 81.0  | 72              | 63.2  |         |
| Y                    | 13                 | 9.2   | 31              | 27.2  | 0.0001  |
| Previous PI          |                    |       |                 |       |         |
| N                    | 123                | 86.6  | 69              | 60.5  |         |
| Y                    | 19                 | 13.4  | 45              | 39.5  | <0.0001 |
| Previous NNRTI       |                    |       |                 |       |         |
| N                    | 74                 | 52.1  | 75              | 65.8  |         |
| Y                    | 68                 | 47.9  | 39              | 34.2  | 0.03    |
| Previous INI         |                    |       |                 |       |         |
| N                    | 89                 | 62.7  | 41              | 36.0  |         |
| Y                    | 53                 | 37.3  | 73              | 64.0  | <0.0001 |
| Lipid-lowering drugs |                    |       |                 |       |         |
| N                    | 115                | 81.0  | 84              | 73.7  |         |
| Y                    | 27                 | 19.0  | 30              | 26.3  | 0.16    |

|              | DOR-based regimens |       |                 |       | P    |
|--------------|--------------------|-------|-----------------|-------|------|
|              | 3TC/TDF/DOR        |       | Other DOR-based |       |      |
|              | N=142              | 55.5% | N=114           | 44.5% |      |
| <hr/>        |                    |       |                 |       |      |
| Diabetes     |                    |       |                 |       |      |
| N            | 138                | 97.2  | 105             | 92.1  |      |
| Y            | 4                  | 2.8   | 9               | 7.9   | 0.09 |
| AST >40 IU/L |                    |       |                 |       |      |
| N            | 126                | 88.7  | 102             | 89.5  |      |
| Y            | 16                 | 11.3  | 12              | 10.5  | 0.85 |
| ALT >40 IU/L |                    |       |                 |       |      |
| N            | 126                | 88.7  | 102             | 89.5  |      |
| Y            | 16                 | 11.3  | 12              | 10.5  | 0.85 |

Table S3. Baseline characteristics of PLWH on 3TC/TDF/DOR and other DOR-based regimens.

| Baseline                 | DOR- based regimens |      |                 |      | P       |
|--------------------------|---------------------|------|-----------------|------|---------|
|                          | 3TC/TDF/DOR         |      | Other DOR-based |      |         |
|                          | Mean                | SD   | Mean            | SD   |         |
| Age, years               | 49.0                | 10.9 | 55.8            | 10.8 | <0.0001 |
| BMI, Kg/m³               | 26.5                | 5.7  | 25.9            | 4.9  | 0.38    |
| Weight, Kg               | 78.6                | 16.3 | 74.4            | 14.3 | 0.04    |
| HDL-C, mg/mL             | 48.5                | 13.2 | 50.6            | 15.7 | 0.25    |
| Total Cholesterol, mg/mL | 199.0               | 42.8 | 194.0           | 48.0 | 0.38    |
| LDL-C, mg/mL             | 121.4               | 37.2 | 112.7           | 39.3 | 0.08    |

Table S4. Baseline characteristics of PLWH on 3TC/TDF/DOR and other DOR-based regimens.

|                            | DOR-based regimens |       |       |                 |       |        |      |
|----------------------------|--------------------|-------|-------|-----------------|-------|--------|------|
|                            | 3TC/TDF/DOR        |       |       | Other DOR-based |       |        | P    |
|                            | Median             | Q1    | Q3    | Median          | Q1    | Q3     |      |
| CD4, cells/mm <sup>3</sup> | 756.0              | 510.0 | 970.0 | 670.0           | 496.0 | 1012.0 | 0.43 |
| Triglycerides, mg/mL       | 121.0              | 84.0  | 173.0 | 122.0           | 98.0  | 180.0  | 0.38 |
| TC/HDL-C, mg/mL            | 4.2                | 3.4   | 5.1   | 3.8             | 3.3   | 4.6    | 0.04 |
| AST, IU/L                  | 22.0               | 18.0  | 28.0  | 22.0            | 18.0  | 27.0   | 0.48 |
| ALT, IU/L                  | 23.0               | 18.0  | 30.0  | 21.5            | 16.0  | 31.5   | 0.78 |

Table S5. Baseline characteristics of PLWH on 3TC/TDF/DOR and other DOR-based regimens, not on lipid-lowering drugs (n=199).

|                          | DOR-based regimens |         |                 |         | P    |
|--------------------------|--------------------|---------|-----------------|---------|------|
|                          | 3TC/TDF/DOR        |         | Other DOR-based |         |      |
|                          | Mean               | SD      | Mean            | SD      |      |
| HDL-C, mg/mL             | 48.7               | 12.5    | 50.6            | 15.3    | 0.36 |
| Total cholesterol, mg/mL | 196.5              | 42.1    | 196.9           | 49.9    | 0.95 |
| LDL-C, mg/mL             | 120.7              | 37.8    | 116.3           | 39.1    | 0.44 |
|                          | Median             | IQR     | Median          | IQR     |      |
| TC/HDL-C                 | 4.2                | 3.4-4.8 | 4.0             | 3.3-4.7 | 0.34 |
| Triglycerides, mg/mL     | 113                | 80-168  | 116             | 90-174  | 0.27 |

Table S6. Baseline characteristics of 401 experienced men enrolled in the SCOLTA Project.

|                                          | Cohort                 |                   |                        |                   | P-value |
|------------------------------------------|------------------------|-------------------|------------------------|-------------------|---------|
|                                          | Doravirine             |                   | Rilpivirine            |                   |         |
|                                          | N or mean<br>or median | % or SD<br>or IQR | N or mean<br>or median | % or SD or<br>IQR |         |
| Age, years, mean, SD                     | 52.4                   | 11.7              | 46.8                   | 9.7               | <0.0001 |
| BMI, Kg/m <sup>2</sup> , mean, SD        | 26.0                   | 4.5               | 24.8                   | 3.5               | 0.005   |
| Weight, Kg, mean, SD                     | 79.1                   | 14.1              | 76.0                   | 13.1              | 0.02    |
| Ethnicity, n, %                          |                        |                   |                        |                   |         |
| Caucasian                                | 168                    | 91.8              | 205                    | 94.0              |         |
| Other                                    | 15                     | 8.2               | 13                     | 6.0               | 0.38    |
| Risk factor for HIV<br>acquisition, n, % |                        |                   |                        |                   |         |
| IDU                                      | 28                     | 15.3              | 42                     | 19.3              |         |
| Other                                    | 28                     | 15.3              | 12                     | 5.5               |         |
| Sexual                                   | 127                    | 69.4              | 164                    | 75.2              | 0.04    |
| HbsAg, n, %                              |                        |                   |                        |                   |         |
| Missing                                  | 19                     | 10.4              | 7                      | 3.2               |         |
| Negative                                 | 155                    | 84.7              | 196                    | 89.9              |         |
| Positive                                 | 9                      | 4.9               | 15                     | 6.9               | 0.52    |
| HCV, n, %                                |                        |                   |                        |                   |         |
| Missing                                  | 15                     | 8.2               | 1                      | 0.5               |         |
| Negative                                 | 136                    | 74.3              | 166                    | 76.1              |         |
| Positive                                 | 32                     | 17.5              | 51                     | 23.4              | 0.29    |
| HbsAg and/or HCV, n, %                   |                        |                   |                        |                   |         |
| Missing                                  | 14                     | 7.7               | 1                      | 0.5               |         |
| Negative                                 | 129                    | 70.5              | 154                    | 70.6              |         |
| Positive                                 | 40                     | 21.9              | 63                     | 28.9              | 0.24    |
| HCVRNA, n, %                             |                        |                   |                        |                   |         |
| Undetectable                             | 36                     | 90.0              | 28                     | 44.4              |         |
| Detectable                               | 4                      | 10.0              | 35                     | 55.6              | <0.0001 |
| HIVRNA, n, %                             |                        |                   |                        |                   |         |
| Undetectable                             | 166                    | 90.7              | 207                    | 95.0              |         |
| Detectable                               | 17                     | 9.3               | 11                     | 5.0               | 0.10    |

|                                          | Cohort                 |                   |                        |                   | P-value |
|------------------------------------------|------------------------|-------------------|------------------------|-------------------|---------|
|                                          | Doravirine             |                   | Rilpivirine            |                   |         |
|                                          | N or mean<br>or median | % or SD<br>or IQR | N or mean<br>or median | % or SD or<br>IQR |         |
|                                          |                        |                   |                        |                   |         |
| Previous PI, n, %                        |                        |                   |                        |                   |         |
| N                                        | 140                    | 76.5              | 120                    | 55.0              |         |
| Y                                        | 43                     | 23.5              | 98                     | 45.0              | <0.0001 |
| Previous NNRTI, n, %                     |                        |                   |                        |                   |         |
| N                                        | 107                    | 58.5              | 114                    | 52.3              |         |
| Y                                        | 76                     | 41.5              | 104                    | 47.7              | 0.21    |
| Previous INSTI, n, %                     |                        |                   |                        |                   |         |
| N                                        | 92                     | 50.3              | 204                    | 93.6              |         |
| Y                                        | 91                     | 49.7              | 14                     | 6.4               | <0.0001 |
| Current TDF, n, %                        |                        |                   |                        |                   |         |
| N                                        | 76                     | 41.5              | 14                     | 6.4               |         |
| Y                                        | 107                    | 58.5              | 204                    | 93.6              | <0.0001 |
| Previous TDF, n, %                       |                        |                   |                        |                   |         |
| N                                        | 149                    | 81.4              | 39                     | 17.9              |         |
| Y                                        | 34                     | 18.6              | 179                    | 82.1              | <0.0001 |
| CD4, cells/mm <sup>3</sup> , median, IQR | 696                    | 494-941           | 640                    | 495-811           | 0.02    |
| CDC stage, n, %                          |                        |                   |                        |                   |         |
| missing                                  | 3                      | 1.6               | .                      | .                 |         |
| A                                        | 81                     | 44.3              | 117                    | 53.7              |         |
| B                                        | 59                     | 32.2              | 55                     | 25.2              |         |
| C                                        | 40                     | 21.9              | 46                     | 21.1              | 0.17    |
| TC, mg/dL, mean, SD                      | 191.9                  | 45.6              | 188.9                  | 43.0              | 0.50    |
| HDL-C, mg/dL, mean, SD                   | 45.8                   | 10.6              | 43.8                   | 11.0              | 0.07    |
| LDL-C, mg/dL, mean, SD                   | 115.6                  | 39.9              | 113.4                  | 39.0              | 0.58    |
| TC/HDL-C                                 | 4.2                    | 3.6-5.1           | 4.4                    | 3.6-5.2           | 0.23    |
| Triglycerides, mg/dL, median, IQR        | 129                    | 91-181            | 129                    | 89-186            | 0.90    |
| Lipid lowering drugs, n, %               |                        |                   |                        |                   |         |
| N                                        | 138                    | 75.4              | 197                    | 90.4              |         |
| Y                                        | 45                     | 24.6              | 21                     | 9.6               | <0.0001 |



|                                                   | Cohort                 |                   |                        |                   | P-value |
|---------------------------------------------------|------------------------|-------------------|------------------------|-------------------|---------|
|                                                   | Doravirine             |                   | Rilpivirine            |                   |         |
|                                                   | N or mean<br>or median | % or SD<br>or IQR | N or mean<br>or median | % or SD or<br>IQR |         |
| Diabetes, n, %                                    |                        |                   |                        |                   |         |
| N                                                 | 173                    | 94.5              | 207                    | 95.0              |         |
| Y                                                 | 10                     | 5.5               | 11                     | 5.0               | 0.85    |
| Blood glucose, mg/dL, mean,<br>SD (non-diabetics) | 91                     | 17                | 91                     | 12                |         |
| AST, IU/dL, n, %                                  |                        |                   |                        |                   |         |
| ≤40                                               | 173                    | 94.5              | 180                    | 82.6              |         |
| >40                                               | 10                     | 5.5               | 38                     | 17.4              | 0.0002  |
| Median, IQR                                       | 22                     | 18-27             | 25                     | 19-34             | 0.001   |
| ALT, IU/dL, n, %                                  |                        |                   |                        |                   |         |
| ≤40                                               | 158                    | 86.3              | 144                    | 66.1              |         |
| >40                                               | 25                     | 13.7              | 74                     | 33.9              | <0.0001 |
| Median, IQR                                       | 25                     | 18-32             | 31                     | 22-50             | <0.0001 |

**Table S7.** Change from baseline to T1 (mean, 95% confidence interval) comparison between DOR-based and RPV-based regimens (men, n=401).

| <b>T1-T0</b>                                                                                                                                                                                                | <b>Doravirine<br/>N=183</b> | <b>Rilpivirine<br/>N=218</b> | <b>P-value*</b> |
|-------------------------------------------------------------------------------------------------------------------------------------------------------------------------------------------------------------|-----------------------------|------------------------------|-----------------|
| BMI, Kg/m <sup>2</sup>                                                                                                                                                                                      | -0.0 (-0.2, 0.2)            | <b>0.1 (0.0, 0.2)</b>        | 0.65            |
| Weight, Kg                                                                                                                                                                                                  | 0.2 (-0.3, 0.6)             | <b>0.4 (0.0, 0.7)</b>        | 0.78            |
| Total cholesterol, mg/dL                                                                                                                                                                                    | <b>-20 (-25, -14)</b>       | <b>-16 (-20, -11)</b>        | 0.80            |
| HDL-cholesterol, mg/dL                                                                                                                                                                                      | -1 (-2, 0)                  | <b>-2 (-3, -1)</b>           | 0.20            |
| Total cholesterol /HDL-cholesterol                                                                                                                                                                          | <b>-0.35 (-0.39, -0.20)</b> | -0.08 (-0.30, 0.13)          | 0.87            |
| LDL-cholesterol, mg/dL                                                                                                                                                                                      | <b>-15 (-20, -10)</b>       | <b>-8 (-12, -5)</b>          | 0.44            |
| Triglycerides, mg/dL                                                                                                                                                                                        | <b>-24 (-40, -8)</b>        | <b>-26 (-39, -12)</b>        | 0.12            |
| <b>Not on lipid-lowering drugs</b>                                                                                                                                                                          |                             |                              |                 |
| Total cholesterol, mg/dL                                                                                                                                                                                    | <b>-18 (-24, -13)</b>       | <b>-17 (-21, -13)</b>        | 0.26            |
| HDL-cholesterol, mg/dL                                                                                                                                                                                      | -1 (-2, 1)                  | <b>-3 (-4, -1)</b>           | 0.008           |
| Total cholesterol /HDL-cholesterol                                                                                                                                                                          | <b>-0.33 (-0.45, -0.22)</b> | -0.05 (-0.22, 0.13)          | 0.48            |
| LDL-cholesterol, mg/dL                                                                                                                                                                                      | <b>-14 (-20, -9)</b>        | <b>-9 (-13, -6)</b>          | 0.71            |
| Triglycerides, mg/dL                                                                                                                                                                                        | <b>-24 (-44, -5)</b>        | <b>-24 (-38, -10)</b>        | 0.19            |
| <b>Liver enzymes</b>                                                                                                                                                                                        |                             |                              | <b>P**</b>      |
| AST ≤40 UI/L at T0                                                                                                                                                                                          | <b>2 (1, 4)</b>             | <b>3 (1, 5)</b>              | 0.15            |
| AST >40 UI/L at T0                                                                                                                                                                                          | -4 (-23, 15)                | -3 (-14, 7)                  | 0.83            |
| ALT ≤40 UI/L at T0                                                                                                                                                                                          | <b>3 (2, 5)</b>             | <b>10 (7, 13)</b>            | 0.001           |
| ALT >40 UI/L at T0                                                                                                                                                                                          | -10 (-20, 1)                | -4 (-14, 7)                  | 0.72            |
| ALT: alanine aminotransferase; AST: aspartate aminotransferase; DOR1: lamivudine/tenofovir disoproxil fumarate; DOR2: other DOR-based regimens; HDL: high density lipoprotein; LDL: low density lipoprotein |                             |                              |                 |
| Bold: change from baseline p<0.05 (paired t-test).                                                                                                                                                          |                             |                              |                 |
| *multivariate analysis of variance, including baseline age, weight, previous use of PI and INI, previous and current use of TAF and TDF, plus: -lipid lowering drugs use in the overall sample.             |                             |                              |                 |
| ** multivariate analysis of variance, including baseline age, weight, previous and current use of TDF, hepatic virus coinfections.                                                                          |                             |                              |                 |

Table S8. Change from baseline to T1 (mean, 95% confidence interval), comparison between men on 3TC/TDF/DOR (DOR1) or other DOR-based regimens (DOR2) (n=183).

| <b>T1-T0</b>                                                                                                                                                                                                                                                                                                                                                                                                                                                                                                                                                                               | <b>DOR1<br/>N=106</b>       | <b>DOR2<br/>N=77</b>        | <b>P-value*</b>  |
|--------------------------------------------------------------------------------------------------------------------------------------------------------------------------------------------------------------------------------------------------------------------------------------------------------------------------------------------------------------------------------------------------------------------------------------------------------------------------------------------------------------------------------------------------------------------------------------------|-----------------------------|-----------------------------|------------------|
| BMI, Kg/m <sup>2</sup>                                                                                                                                                                                                                                                                                                                                                                                                                                                                                                                                                                     | -0.1 (-0.2, 0.3)            | -0.1 (-0.3, 0.2)            | 0.69             |
| Weight, Kg                                                                                                                                                                                                                                                                                                                                                                                                                                                                                                                                                                                 | 0.3 (-0.4, 0.9)             | 0.0 (-0.6, 0.7)             | 0.65             |
| Total cholesterol, mg/dL                                                                                                                                                                                                                                                                                                                                                                                                                                                                                                                                                                   | <b>-26 (-33, -18)</b>       | <b>-11 (-19, -3)</b>        | 0.89             |
| HDL-cholesterol, mg/dL                                                                                                                                                                                                                                                                                                                                                                                                                                                                                                                                                                     | -1 (-3, 0)                  | -0 (-2, 2)                  | 0.04             |
| Total cholesterol /HDL-cholesterol                                                                                                                                                                                                                                                                                                                                                                                                                                                                                                                                                         | <b>-0.41 (-0.60, -0.22)</b> | <b>-0.26 (-0.48, -0.04)</b> | 0.36             |
| LDL-cholesterol, mg/dL                                                                                                                                                                                                                                                                                                                                                                                                                                                                                                                                                                     | <b>-20 (-26, -14)</b>       | -7 (-16, 1)                 | 0.75             |
| Triglycerides, mg/dL                                                                                                                                                                                                                                                                                                                                                                                                                                                                                                                                                                       | <b>-19 (-36, -2)</b>        | -30 (-62, 1)                | 0.94             |
| <b>Not on lipid-lowering drugs</b>                                                                                                                                                                                                                                                                                                                                                                                                                                                                                                                                                         |                             |                             |                  |
| Total cholesterol, mg/dL                                                                                                                                                                                                                                                                                                                                                                                                                                                                                                                                                                   | <b>-24 (-31, -17)</b>       | <b>-8 (-17, -0)</b>         | 0.82             |
| HDL-cholesterol, mg/dL                                                                                                                                                                                                                                                                                                                                                                                                                                                                                                                                                                     | -1 (-3, 1)                  | -0 (-2, 3)                  | 0.03             |
| Total cholesterol /HDL-cholesterol                                                                                                                                                                                                                                                                                                                                                                                                                                                                                                                                                         | <b>-0.39 (-0.58, -0.21)</b> | -0.22 (-0.47, 0.03)         | 0.24             |
| LDL-cholesterol, mg/dL                                                                                                                                                                                                                                                                                                                                                                                                                                                                                                                                                                     | <b>-19 (-25, -13)</b>       | -5 (-15, 4)                 | 0.72             |
| Triglycerides, mg/dL                                                                                                                                                                                                                                                                                                                                                                                                                                                                                                                                                                       | <b>-18 (-35, -1)</b>        | -36 (-80, 9)                | 0.92             |
| <b>Liver enzymes</b>                                                                                                                                                                                                                                                                                                                                                                                                                                                                                                                                                                       |                             |                             | <b>P-value**</b> |
| AST ≤40 UI/L at T0                                                                                                                                                                                                                                                                                                                                                                                                                                                                                                                                                                         | <b>2 (1, 4)</b>             | <b>3 (1, 4)</b>             | 0.85             |
| AST >40 UI/L at T0                                                                                                                                                                                                                                                                                                                                                                                                                                                                                                                                                                         | -6 (-70, 59)                | -3 (-21, 15)                | 0.74             |
| ALT ≤40 UI/L at T0                                                                                                                                                                                                                                                                                                                                                                                                                                                                                                                                                                         | <b>4 (2, 6)</b>             | 2 (-0, 4)                   | 0.02             |
| ALT >40 UI/L at T0                                                                                                                                                                                                                                                                                                                                                                                                                                                                                                                                                                         | <b>-16 (-28, -4)</b>        | -2 (-21, 16)                | 0.13             |
| ALT: alanine aminotransferase; AST: aspartate aminotransferase; DOR1: lamivudine/tenofovir disoproxil fumarate; DOR2: other DOR-based regimens; HDL: high density lipoprotein; LDL: low density lipoprotein<br>Bold: change from baseline p<0.05 (paired t-test).<br>*multivariate analysis of variance, including baseline age, weight, previous use of PI and INI, previous use of TAF and TDF, plus: -lipid lowering drugs use in the overall sample.<br>** multivariate analysis of variance, including baseline age, weight, previous use of TAF and TDF, hepatic virus coinfections. |                             |                             |                  |
